# Supplementary material
Source: HighWire-hosted journal article supplement (https://hw-f5-jim.highwire.org/content/69/3/697)
Supplement: inline-supplementary-material-3 [file inline-supplementary-material-3.pdf]

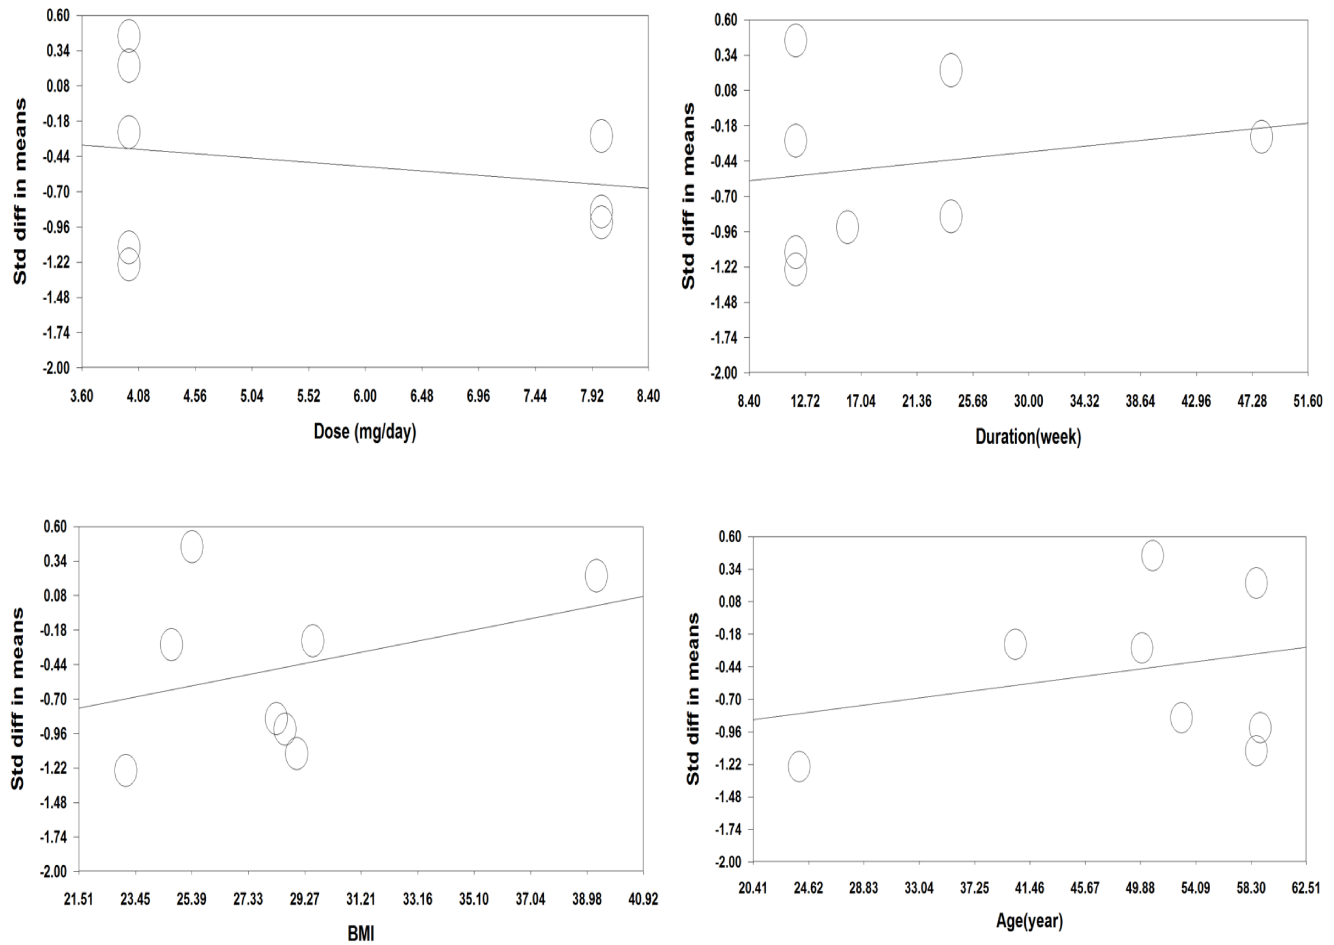

**Supplementary figure 2.** Random-effects Meta-regression plots of the association between net changes in circulating MDA level with a dose of rosiglitazone, duration of intervention, BMI, and age. The size of each circle is inversely proportional to the variance of change.
